# Supplementary material for: Collecting 3D electron diffraction data by the rotation method
Source: publisher site journal article supplement (doi:10.1524/zkri.2010.1202), 2010-01-07
Supplement: Supplementary file 1 [file The movies.doc]

Running title: Rotation electron diffraction

# Collecting 3D electron diffraction data by the rotation method

Daliang Zhang, Peter Oleynikov, Sven Hovmöller* and Xiaodong Zou

Structural chemistry, Stockholm University, SE-106 91 Stockholm, Sweden

Corresponding author: Sven Hovmöller, svenh@struc.su.se

Received

Keywords: Electron diffraction, data collection, 3D diffraction data

# Abstract

A new method for collecting complete three-dimensional electron diffraction data is described. Diffraction data is collected by combining electron beam tilt at many very small steps, with rotation of the crystal in a few but large steps. A number of practical considerations are discussed, as well as advantages and disadvantages compared to other methods of collecting electron diffraction data.

Moives:

1. Goniometer rotated by a step of 0.2 degree.wmv

The crystal was rotated by a step of 0.2ºby the goniometor for 36º in total.

1. Electron beam rotated by a step of 0.05 degree.wmv

The electron beam was rotated relative to the crystal by a step of 0.05º for 4º in total.
